# Supplementary material for: High throughput sequencing-based analysis of the soil bacterial community structure and functions of Tamarix shrubs in the lower reaches of the Tarim River
Source: PeerJ. 2021 Sep 8;9:e12105. doi: 10.7717/peerj.12105 (PMC8434807; doi:10.7717/peerj.12105)
Supplement: Supplemental Information 2 [file peerj-09-12105-s002.xls]

## Sheet: Sheet1
Sample name	SWC	OM	TN	TP	TK	NO3-	NH4+	AP	AK	pH(1:5)	EC1:5)	TDS
	(%)	g/kg	g/kg	g/kg	g/kg	mg/kg	mg/kg	mg/kg	mg/kg		ms/cm	g/kg
Xa1	0.68	6.30878	0.667727	0.565962	17.5361	14.182	2.909	2.5313	513.306	7.82	6.78	23.3
Xa2	0.49	10.1373	0.441107	0.615273	19.5201	3.828	4.135	4.98627	580.668	7.94	7.4	26.65
Xa3	0.51	12.6536	0.542732	0.540511	18.0166	2.339	5.323	4.34617	943.564	8.07	7.94	30.35
Xb1	0.57	7.12792	0.44503	0.526054	19.3121	8.263	2.559	2.61414	332.33	7.76	3.73	13.8
Xb2	2.02	5.96773	0.345839	0.503396	19.3349	2.511	3.737	1.37913	229.16	7.59	4.46	15.975
Xb3	2.28	5.10137	0.462563	0.577906	17.0624	3.548	3.475	1.18333	388.751	7.79	5.26	17.5
Xc1	0.98	2.47722	0.220727	0.450375	18.6307	1.518	2.759	0.37003	111.161	8.5	1.9	5.425
Xc2	5.44	4.92396	0.37504	0.525675	18.6104	4.938	3.801	1.25111	192.42	7.86	4.32	15.1
Xc3	2.1	8.27513	0.563665	0.513221	18.2185	7.462	3.76	2.47106	254.659	7.67	5.97	22.075
Fa1	1.83	6.71235	0.624333	0.555218	17.0154	2.452	3.824	2.88524	303.985	7.69	5.44	19.35
Fa2	1.58	7.60472	0.567953	0.557469	17.293	12.412	3.973	4.56456	306.313	7.66	6.4	21.7
Fa3	0.92	8.59559	0.318644	0.594372	17.2539	6.292	4.538	4.80554	610.341	7.81	5.28	21.35
Fb1	1.88	6.53743	0.354566	0.520212	18.1745	2.326	4.077	1.3716	368.517	7.5	7.85	28.3
Fb2	1.93	6.89454	0.386025	0.565147	18.0141	7.263	2.543	1.62764	234.277	7.68	3.41	10.45
Fb3	1.61	7.59125	0.491918	0.562021	17.9126	5.158	4.117	2.36563	558.253	7.43	6.62	21.65
Fc1	1.02	9.33093	0.352	0.563933	18.0048	5.422	12.524	4.23321	229.936	7.52	5.67	18.5
Fc2	1.06	8.4868	0.505016	0.563952	18.238	4.606	12.351	4.5495	197.445	7.57	5.04	15.925
Fc3	1.06	8.46381	0.537088	0.550915	17.5174	5.216	11.594	2.26773	226.552	7.49	6.22	20.1
