# Supplementary material for: High throughput sequencing-based analysis of the soil bacterial community structure and functions of Tamarix shrubs in the lower reaches of the Tarim River
Source: PeerJ. 2021 Sep 8;9:e12105. doi: 10.7717/peerj.12105 (PMC8434807; doi:10.7717/peerj.12105)
Supplement: Supplemental Information 3 [file peerj-09-12105-s003.xls]

## Sheet: Sheet1
Sample Name	observed_species	shannon	simpson	chao1	ACE	goods_coverage	PD_whole_tree	Sample Name
Fa1	2248	8.207	0.988	2456.32	2482.99	0.993	125.727	Fa2
Fa2	2497	8.278	0.988	2734.81	2787.26	0.992	143.41	Fa3
Fa3	3034	9.184	0.993	3334.19	3372.82	0.991	166.96	Fa4
Fb1	2724	7.825	0.968	3010.96	3047.88	0.991	150.449	Fb2
Fb2	2894	9.306	0.995	3122.13	3127.43	0.992	157.79	Fb3
Fb3	1668	8.193	0.991	1813.71	1817.57	0.996	100.721	Fb4
Fc1	2158	8.239	0.985	2363.84	2394.7	0.993	129.546	Fc2
Fc2	2511	8.813	0.99	2722.89	2754.95	0.993	138.692	Fc3
Fc3	2600	8.849	0.991	2854.01	2897.95	0.992	147.287	Fc4
Xa1	2897	8.736	0.989	3192.44	3265.09	0.99	160.373	Xa2
Xa2	2713	8.51	0.983	2986.18	3053.43	0.991	151.846	Xa3
Xa3	878	6.836	0.973	964.45	984.45	0.997	58.806	Xa4
Xb1	2055	9.017	0.995	2209.38	2221.39	0.995	124.66	Xb2
Xb2	2431	8.498	0.984	2732.35	2744.55	0.992	141.696	Xb3
Xb3	2560	8.74	0.991	2861.59	2873.24	0.991	139.976	Xb4
Xc1	2259	8.339	0.988	2500.73	2538.18	0.993	136.342	Xc2
Xc2	2122	8.112	0.982	2331.56	2345.78	0.994	134.1	Xc3
Xc3	2680	9.086	0.994	2916.04	2954.6	0.992	143.606	Xc4
