# Supplementary material for: High throughput sequencing-based analysis of the soil bacterial community structure and functions of Tamarix shrubs in the lower reaches of the Tarim River
Source: PeerJ. 2021 Sep 8;9:e12105. doi: 10.7717/peerj.12105 (PMC8434807; doi:10.7717/peerj.12105)
Supplement: Supplemental Information 4 [file peerj-09-12105-s004.xls]

## Sheet: Sheet1
	CAP1	CAP2	r2	Pr(>r)
SWC	0.886045	0.4636	0.228735	0.13993
OM	-0.979714	-0.200403	0.520044	0.0029985
TN	-0.986594	0.163197	0.320335	0.053973
TP	-0.988121	-0.153679	0.270211	0.093953
TK	0.973009	0.230767	0.102709	0.449775
NO3	-0.610859	-0.791739	0.0137773	0.904048
NH4	0.00707398	-0.999975	0.37137	0.027986
AP	-0.75661	-0.653867	0.435603	0.0134933
AK	-0.957876	0.287181	0.597311	0.00049975
PH	0.933118	0.359569	0.0222168	0.853073
EC	-0.978055	0.208349	0.623575	0.0009995
