# Supplementary material for: High throughput sequencing-based analysis of the soil bacterial community structure and functions of Tamarix shrubs in the lower reaches of the Tarim River
Source: PeerJ. 2021 Sep 8;9:e12105. doi: 10.7717/peerj.12105 (PMC8434807; doi:10.7717/peerj.12105)
Supplement: Supplemental Information 5 [file peerj-09-12105-s005.xls]

## Sheet: Sheet1
	NMDS1	NMDS2
Fa1	-0.0495235	-0.17351
Fa2	0.0655769	-0.329594
Fa3	0.34972	-0.00437982
Fb1	0.467478	-0.0975476
Fb2	-0.0523484	-0.0763103
Fb3	-0.474439	-0.0330028
Fc1	0.308609	-0.269767
Fc2	0.258421	-0.169081
Fc3	0.223875	-0.238417
Xa1	0.166987	0.376864
Xa2	-0.0941429	0.270895
Xa3	-1.29317	-0.258084
Xb1	-0.794304	0.38938
Xb2	0.180903	-0.0067248
Xb3	0.00884056	0.0389799
Xc1	0.342527	0.289838
Xc2	0.253269	0.183205
Xc3	0.131726	0.107256
