# Supplementary material for: High throughput sequencing-based analysis of the soil bacterial community structure and functions of Tamarix shrubs in the lower reaches of the Tarim River
Source: PeerJ. 2021 Sep 8;9:e12105. doi: 10.7717/peerj.12105 (PMC8434807; doi:10.7717/peerj.12105)
Supplement: Supplemental Information 6 [file peerj-09-12105-s006.xls]

## Sheet: Sheet1
correlatiaon
	Halobacterota	Proteobacteria	unidentified_Bacteria	unidentified_Archaea	Bacteroidota	Actinobacteriota	Firmicutes	Desulfobacterota	Chloroflexi	Acidobacteriota	Myxococcota	Gemmatimonadota	Deinococcota	Crenarchaeota	Verrucomicrobiota	Planctomycetes	Planctomycetota	Thermoplasmatota	Bdellovibrionota	WPS.2	Gemmatimonadetes	Nanoarchaeota	Entotheonellaeota	Abditibacteriota	Sumerlaeota	Methylomirabilota	Nitrospirota	RCP2.54	Armatimonadota	Spirochaetota	MBNT15	NB1.j	Chlamydiae	Candidatus_Yanofskybacteria	Cyanobacteria
SWC	-0.392359	0.0567889	0.338668	0.32731	-0.139391	-0.0258131	0.0340733	-0.123903	0.0330408	-0.326278	0.107383	0.379969	0.180692	0.171399	-0.248838	-0.101187	0.0888889	0.0836345	-0.333505	-0.0481752	-0.125	0.0304991	0.125194	-0.285383	0.0558718	0.321115	-0.136293	0.0506198	-0.263322	0.169177	-0.283058	0.0425759	0.096124	-0.182882	0.198861
OM	0.634675	-0.477812	-0.498452	-0.180599	0.184727	0.108359	0.320949	-0.0113519	-0.122807	0.162023	0.0257998	-0.242518	-0.312693	-0.126935	0.0856553	0.00722394	0.0506199	0.0588235	0.529412	0.0135954	-0.174497	0.0672736	-0.193382	0.224197	-0.0330921	-0.337461	0.139319	0.0702117	0.312307	-0.162865	0	-0.262589	-0.192149	-0.272056	0.00621121
TN	0.529412	-0.213622	-0.386997	0.124871	0.417957	-0.484004	0.285862	0.465428	-0.391125	-0.508772	-0.31063	-0.463364	-0.0629515	-0.719298	-0.0134159	-0.176471	0.0289256	-0.337461	-0.0546956	0.185804	-0.329375	-0.176593	-0.201655	-0.0974261	0.214065	-0.27967	-0.517028	-0.287042	0.224406	-0.0684657	-0.281879	-0.221073	0.0444215	-0.453426	-0.434785
TP	0.49226	-0.168215	-0.587203	0.112487	0.343653	-0.0567595	-0.0175439	0.149639	-0.393189	0.143447	-0.0712074	-0.316821	0.112487	-0.24871	0.242518	0.172343	0.407025	-0.153767	0.626419	0.242451	-0.397522	-0.0998592	0.0175802	0.588078	0.238884	-0.226006	-0.126935	0.100155	0.353672	0.173239	0.10635	-0.2273	-0.0392562	0.031173	0.133541
TK	-0.389061	0.341589	0.325077	-0.19711	-0.0319917	0.114551	-0.308566	0.0485036	0.31063	0.405573	-0.0464396	0.122807	0.360165	0.401445	-0.0877193	0.281734	-0.450413	-0.0257998	-0.153767	-0.0101965	0.468766	0.21023	0.11272	-0.113859	-0.0910033	0.504644	0.273478	0.411977	0.0186143	-0.389009	0.0774393	0.275043	-0.0516529	-0.0538444	0.0548657
NO3	0.0588235	0.0546956	-0.0629515	-0.199174	-0.0113519	0.124871	-0.00722394	0.00515996	0.157895	0.28999	0.157895	0.0608875	0.145511	-0.128999	0.50258	0.568627	0.305785	0.405573	0.234262	0.26511	0.0764068	-0.145059	0.14788	0.388531	0.489143	-0.0154799	0.114551	0.293237	0.618409	0.0373449	0.334538	0.137003	0.134298	-0.104855	0.209111
NH4	0.508772	-0.4613	-0.26935	-0.186791	-0.139319	0.234262	0.333333	-0.393189	-0.0196078	-0.153767	0.221878	-0.168215	-0.430341	0.00515996	-0.273478	-0.195046	0.190083	0.0794634	0.517028	-0.280971	-0.201342	-0.113524	-0.185109	-0.0293452	-0.139607	-0.261094	0.213622	-0.0784719	-0.189245	0.0684657	-0.189985	-0.365341	-0.13843	-0.34007	0.0590065
AP	0.620227	-0.261094	-0.469556	-0.21775	0.0546956	0.0423117	0.20743	-0.0608875	-0.174407	0.20743	-0.0175439	-0.151703	-0.157895	-0.26935	0.358101	0.26935	0.0444215	0.0877193	0.455108	0.123491	-0.0784719	-0.324805	0.0072389	0.372097	0.233713	-0.236326	0.0423117	0.152814	0.411583	-0.132782	0.245741	-0.167102	-0.070248	-0.199791	0.0714289
AK	0.47162	-0.0773994	-0.465428	0.372549	0.638803	-0.479876	-0.26935	0.508772	-0.675955	-0.240454	-0.564499	-0.54386	-0.0257998	-0.657379	0.170279	-0.0588235	-0.127066	-0.213622	0.149639	0.00679769	-0.392359	-0.141905	-0.216133	0.362707	-0.270942	-0.587203	-0.49226	-0.381002	0.32575	-0.00207472	0.021683	-0.344583	0.0485537	0.06518	-0.274328
PH	-0.176471	0.444788	-0.0526316	-0.176471	0.234262	-0.22807	-0.378741	0.356037	-0.27967	0.0608875	-0.393189	0.0175439	-0.116615	-0.170279	0.0773994	0.162023	-0.251033	-0.349845	-0.430341	0.115561	-0.138358	0.0157672	0.346433	0.102121	-0.101345	0.26935	-0.159959	-0.191017	-0.119959	-0.00829887	0.283944	0.310332	0.0320248	0.439257	-0.109731
EC	0.581011	-0.265222	-0.395253	0.267286	0.48194	-0.589267	-0.0361197	0.356037	-0.605779	-0.49226	-0.281734	-0.684211	-0.256966	-0.649123	-0.0505676	-0.263158	0.0123967	-0.399381	0.285862	-0.15748	-0.357254	-0.183951	-0.185109	0.259412	-0.266805	-0.370485	-0.436533	-0.438823	0.141676	0.147305	-0.282912	-0.446297	0.182851	-0.491684	-0.337476
p value
	Halobacterota	Proteobacteria	unidentified_Bacteria	unidentified_Archaea	Bacteroidota	Actinobacteriota	Firmicutes	Desulfobacterota	Chloroflexi	Acidobacteriota	Myxococcota	Gemmatimonadota	Deinococcota	Crenarchaeota	Verrucomicrobiota	Planctomycetes	Planctomycetota	Thermoplasmatota	Bdellovibrionota	WPS.2	Gemmatimonadetes	Nanoarchaeota	Entotheonellaeota	Abditibacteriota	Sumerlaeota	Methylomirabilota	Nitrospirota	RCP2.54	Armatimonadota	Spirochaetota	MBNT15	NB1.j	Chlamydiae	Candidatus_Yanofskybacteria	Cyanobacteria
SWC	0.107291	0.822899	0.169216	0.184893	0.581199	0.919019	0.893228	0.624253	0.896447	0.186364	0.671487	0.119864	0.473057	0.49648	0.319387	0.689518	0.72578	0.741448	0.176226	0.849446	0.621163	0.904377	0.620617	0.250999	0.825717	0.193839	0.589709	0.841895	0.291081	0.502163	0.25505	0.866787	0.704374	0.467618	0.428899
OM	0.00466284	0.0449122	0.0352536	0.473289	0.463061	0.66866	0.194082	0.964342	0.627346	0.520665	0.91906	0.332231	0.206454	0.615727	0.73541	0.977304	0.841894	0.816654	0.0238582	0.957301	0.488611	0.790834	0.441982	0.371127	0.896287	0.170838	0.581396	0.781904	0.207046	0.51847	1	0.292476	0.444955	0.274774	0.980486
TN	0.0238582	0.394688	0.112611	0.621526	0.0843526	0.0418255	0.25017	0.0516016	0.1085	0.0310685	0.209625	0.0527859	0.804017	0.000766664	0.957864	0.483628	0.90929	0.170838	0.829335	0.460411	0.181973	0.483319	0.422308	0.700544	0.393687	0.261026	0.0280061	0.248133	0.370671	0.787208	0.257119	0.378006	0.861064	0.0587769	0.0713676
TP	0.037965	0.504633	0.0104026	0.656757	0.162629	0.822989	0.944915	0.553423	0.106485	0.570135	0.778883	0.200205	0.656757	0.319645	0.332231	0.494076	0.0936629	0.542403	0.00541003	0.332369	0.102342	0.693404	0.944801	0.0102609	0.339751	0.367178	0.615727	0.692539	0.149923	0.491799	0.67448	0.364367	0.877096	0.902273	0.597313
TK	0.110542	0.165335	0.188085	0.433058	0.899719	0.650834	0.212829	0.84843	0.209625	0.0949534	0.854814	0.627346	0.142062	0.0986919	0.729259	0.257375	0.0606897	0.91906	0.542403	0.967969	0.049729	0.402415	0.656087	0.652817	0.719503	0.0326937	0.272173	0.0893573	0.941559	0.110593	0.760047	0.269327	0.838707	0.831955	0.828811
NO3	0.816654	0.829335	0.804017	0.428158	0.964342	0.621526	0.977304	0.983788	0.531483	0.243092	0.531483	0.81033	0.564541	0.60995	0.0335305	0.0138004	0.217194	0.0949534	0.349454	0.287695	0.763159	0.565764	0.558147	0.111071	0.0393892	0.951388	0.650834	0.237615	0.00622527	0.88304	0.174809	0.587755	0.595219	0.678824	0.404983
NH4	0.0310685	0.0539905	0.279764	0.457989	0.581396	0.349454	0.176463	0.106485	0.938446	0.542403	0.376225	0.504633	0.0746428	0.983788	0.272173	0.437986	0.449958	0.753956	0.0280061	0.258721	0.423043	0.653778	0.462119	0.90798	0.580606	0.295333	0.394688	0.756938	0.451994	0.787208	0.450196	0.136006	0.583834	0.167346	0.816093
AP	0.006032	0.295333	0.0492934	0.385396	0.829335	0.867607	0.408854	0.81033	0.488839	0.408854	0.944915	0.547901	0.531483	0.279764	0.144529	0.279764	0.861064	0.729259	0.0577286	0.625414	0.756938	0.188476	0.977258	0.128372	0.350617	0.345101	0.867607	0.544939	0.0896947	0.599418	0.325645	0.507496	0.781794	0.4267	0.778211
AK	0.048169	0.760167	0.0516016	0.127873	0.00432212	0.0438646	0.279764	0.0310685	0.00207395	0.33649	0.0146636	0.0196436	0.91906	0.00303029	0.499341	0.816654	0.615359	0.394688	0.553423	0.978643	0.107291	0.57433	0.389022	0.139065	0.276822	0.0104026	0.037965	0.118778	0.187119	0.993481	0.931945	0.16142	0.848275	0.797213	0.270624
PH	0.483628	0.0643852	0.83569	0.483628	0.349454	0.3627	0.121164	0.147026	0.261026	0.81033	0.106485	0.944915	0.644932	0.499341	0.760167	0.520665	0.314997	0.154692	0.0746428	0.647944	0.58403	0.950487	0.159032	0.686789	0.689058	0.279764	0.526061	0.447692	0.635412	0.973928	0.253501	0.210085	0.899616	0.0681804	0.664694
EC	0.0114509	0.287484	0.104497	0.283608	0.0428358	0.0100708	0.886853	0.147026	0.00771061	0.037965	0.257375	0.00173755	0.303309	0.00355837	0.842056	0.291392	0.961062	0.1006	0.25017	0.532576	0.145551	0.464974	0.462119	0.298568	0.284508	0.130166	0.070109	0.0684847	0.574956	0.559697	0.255306	0.0633782	0.467694	0.0382252	0.170818
