# Supplementary material for: High throughput sequencing-based analysis of the soil bacterial community structure and functions of Tamarix shrubs in the lower reaches of the Tarim River
Source: PeerJ. 2021 Sep 8;9:e12105. doi: 10.7717/peerj.12105 (PMC8434807; doi:10.7717/peerj.12105)
Supplement: Supplemental Information 8 [file peerj-09-12105-s008.xls]

## Sheet: Sheet1
		Nebkhas Tamarix shrubs				Non-nebkhas Tamarix shrubs
	Shrubs-	Inside canopy	Canopy edge	Shrubs edge	Average	Inside canopy	Canopy edge	Shrubs edge	Average
	position	(Xa)	(Xb)	(Xc)		(Fa)	(Fb)	(Fc)
	OM(g·kg-1)	9.70±1.84a	6.06±0.58a	5.22±1.68a	6.99±1.01A	7.63±0.54a	7.01±0.31a	8.76±0.28a	7.80±0.32A
	TN(g·kg-1)	0.55±0.06a	0.41±0.03a	0.38±0.09a	0.45±0.04A	0.50±0.09a	0.41±0.04a	0.46±0.05a	0.47±0.03A
	TP(g·kg-1)	0.57±0.02a	0.53±0.02a	0.49±0.02a	0.53±0.01A	0.56±0.01a	0.54±0.01a	0.55±0.01a	0.55±0.01A
	TK(g·kg-1)	18.35±0.59a	18.56±0.75a	18.48±0.13a	18.47±0.28A	17.18±0.08b	18.03±0.07a	17.92±0.21a	17.71±0.14B
Soil-	NO3-(mg·kg-1)	6.78±3.72a	4.77±1.76a	4.63±1.72a	5.39±1.33A	7.05±2.90a	4.91±1.43a	5.08±0.24a	5.68±0.99A
factors	NH4+(mg·kg-1)	4.12±0.69a	3.25±0.35a	3.44±0.34a	3.61±0.27B	4.11±0.21b	3.57±0.51b	12.15±0.28a	6.61±1.39A
	AP(mg·kg-1)	3.95±0.73a	1.72±0.44b	1.36±0.61b	2.34±0.50A	4.08±0.60a	1.78±0.29b	3.68±0.71ab	3.18±0.45A
	AK(mg·kg-1)	679.17±133.61a	316.74±46.72b	186.08±41.54b	394.00±85.15A	406.87±101.73a	387.01±93.98a	217.97±10.31a	337.29±50.05A
	PH (1:5)	7.94±0.07a	7.71±0.06a	8.01±0.25a	7.88±0.08A	7.72±0.04a	7.53±0.07a	7.52±0.02a	7.59±0.04B
	EC(ms·cm-1)	7.37±0.33a	4.48±0.44a	4.06±1.18a	5.31±0.64A	5.71±0.34a	5.96±1.32a	5.64±0.34a	5.77±0.41A
	TDS(g·kg-1)	26.76±2.03a	15.75±1.07a	14.21±4.82a	18.91±2.50A	20.81±0.73a	20.13±5.20a	18.17±1.21a	19.71±1.60A
	SWC(%)	0.56a±0.06a	1.62±0.53a	2.84±1.33a	1.67±0.53A	1.44±0.27a	1.81±0.09a	1.05±0.01a	1.43±0.13A
