# Supplementary material for: High throughput sequencing-based analysis of the soil bacterial community structure and functions of Tamarix shrubs in the lower reaches of the Tarim River
Source: PeerJ. 2021 Sep 8;9:e12105. doi: 10.7717/peerj.12105 (PMC8434807; doi:10.7717/peerj.12105)
Supplement: Supplemental Information 9 [file peerj-09-12105-s009.xls]

## Sheet: Sheet1
		Nebkhas Tamarix shrubs				Non-nebkhas Tamarix shrubs
	Shrubs-	Inside -canopy	Canopy-edge	Shrubs- edge	Average	Inside -canopy	Canopy- edge	Shrubs-edge	Average
	position	(Xa)	(Xb)	(Xc)	(X)	(Fa)	(Fb)	(Fc)	(F)
	shannon index	8.03±0.59a	8.75±0.15a	8.51±0.29a	8.43±0.22A	8.56±0.31a	8.44±0.45a	8.63±0.19a	8.54±0.17A
	simpson index	0.98±0.01a	0.99±0.01a	0.99±0.01a	0.99±0.01a	0.99±0.01a	0.98±0.01a	0.99±0.01a	0.99±0.01A
	chao1 index	2381.02+710.78a	2601.11+199.39a	2582.78±173.64a	2521.63±221.74A	2841.77±259.01a	2648.93±418.84a	2646.91±146.51a	2712.54±151.79A
	ACE index	2434.32±727.51a	2613.06±199.33a	2612.85±179.67a	2553.41±225.82A	2881.02±261.12a	2664.29±423.98a	2682.53±149.72a	2742.62±154.06A
	coverage	0.993	0.993	0.993	0.993	0.992	0.993	0.993	0.993
